# Supplementary material for: Genetic analyses of early-onset Alzheimer’s disease using next generation sequencing
Source: PubMed Central journal article supplement (PMC6557896; doi:10.1038/s41598-019-44848-2), 2019-06-10
Supplement: 41598_2019_44848_MOESM1_ESM.pdf [file 41598_2019_44848_MOESM1_ESM.pdf]

## Supplementary information for

### “Genetic analyses of early-onset Alzheimer’s disease using next generation sequencing”

Vo Van Giau<sup>1a</sup>, Eva Bagyinszky<sup>1a</sup>, YoungSoon Yang<sup>2</sup>, Young Chul Youn<sup>3</sup>, Seong Soo A. An<sup>1\*</sup>, SangYun Kim<sup>4\*</sup>

(1) Department of Bionano Technology, Gachon University

(2) Department of Neurology, Veterans Health Service Medical Center, Seoul, Korea

(3) Department of Neurology, Chung-Ang University School of Medicine, Chung-Ang University Hospital

(4) Department of Neurology, Seoul National University College of Medicine & Neurocognitive Behavior Center, Seoul National University Bundang Hospital

<sup>a</sup>These authors contributed equally to this research

+ Address for co-correspondence: Seong Soo A. An, PhD and SangYun Kim, MD, PhD

Seong Soo A. An, PhD

Department of Bionano Technology, Gachon Bionano Research Institute, Gachon University,  
1342 Sungnam-daero, Sujung-gu, Seongnam-si, Gyeonggi-do,  
461-701, South Korea

Tel: +82-31-750-8755

Fax: +82-31-750-8755

E-mail: [seong.an@gmail.com](mailto:seong.an@gmail.com)

SangYun Kim, MD, PhD

Department of Neurology, Seoul National University Bundang Hospital, Seoul National  
University College of Medicine, 300 Gumidong, Bundang-gu, Seongnam-si, Gyeonggi-do,  
463-707, South Korea

Tel: +82-31-787-7462

Fax: +82-31-719-6815

E-mail: [neuroksy@snu.ac.kr](mailto:neuroksy@snu.ac.kr)

## ApoE genotyping

ApoE genotyping with EzWayTMKit was performed by conventional PCR using purified DNA and direct used whole blood of 67 early onset Alzheimer's patients, the results demonstrated that homozygous and heterozygous genotypes generated allele-specific amplicons (**Figure S1** and **Table S1**). The  $\epsilon 3/\epsilon 4$  genotype contains Cys and Arg at codon 112 and Arg at codon 158, produced 113 bp product and 308 bp and 444 bp products as shown on lane 2. Also, the heterozygote  $\epsilon 2/\epsilon 3$  genotype, which contains Cys at codon 112 and Arg at codon 158, produced a 113 bp product at Cys primers and a 253 bp and 308 bp products as revealed at lane 3. The homozygote  $\epsilon 4/\epsilon 4$  genotype, which possesses Arg at both codons 112 and 158, formed 308 bp and 444 bp products at lane 4. Also, the homozygote  $\epsilon 3/\epsilon 3$  genotype, which contains Cys at codon 112 and Arg at codon 158 showed at lane 5.

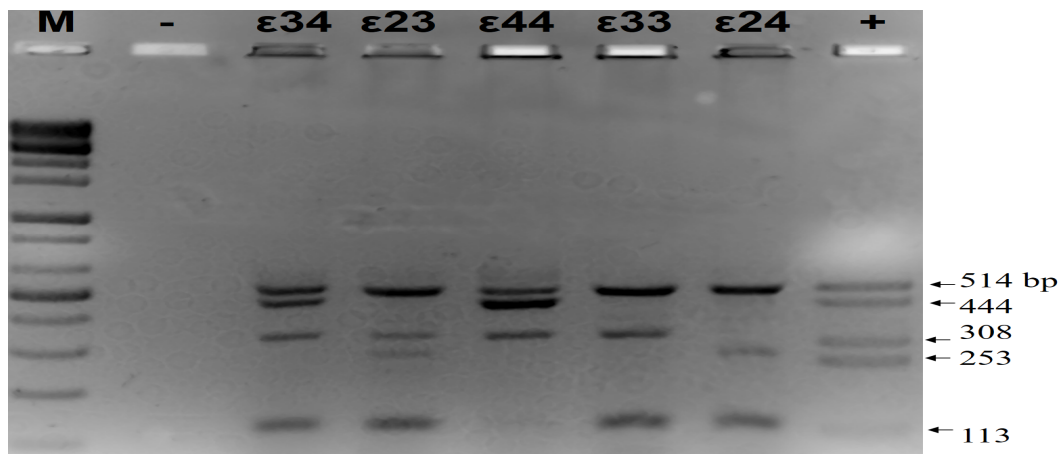

**Figure S1.** Gel electrophoresis of APOE genotypes following the patterns of restriction fragments

67 patients from Korean families who were diagnosed with AD were recruited for this study. Among the patients, the distribution of APOE genotypes was as follows:  $\epsilon 2/\epsilon 3$  (n = 2; 2.9%),  $\epsilon 3/\epsilon 3$  (n = 46; 68.7%),  $\epsilon 3/\epsilon 4$  (n = 13; 19.4%),  $\epsilon 4/\epsilon 4$  (n = 5; 7.4%) and  $\epsilon 2/\epsilon 4$  (n = 1; 1.4%). Furthermore, there were significant patients have carried APOE  $\epsilon 3$  allele, which have accounted for 61.0%, followed with 24% patients who carried at least one ApoE  $\epsilon 4$  allele only.

Noticeably, since the carrier of two APOE  $\epsilon$ 4 alleles have a higher risk and earlier onset of AD than heterozygous subjects. In this presenting, a total of 5 AD patients with two copies of the  $\epsilon$ 4 allele ( $\epsilon$ 4/ $\epsilon$ 4) were identified.

**Table s1.** Genotypes and frequency of ApoE variants in the patients

| AD patients | ApoE allele frequencies (%) |              |              | ApoE genotypes % (n)       |                            |                            |                            |                            |                            |
|-------------|-----------------------------|--------------|--------------|----------------------------|----------------------------|----------------------------|----------------------------|----------------------------|----------------------------|
|             | $\epsilon$ 2                | $\epsilon$ 3 | $\epsilon$ 4 | $\epsilon$ 2/ $\epsilon$ 2 | $\epsilon$ 2/ $\epsilon$ 3 | $\epsilon$ 2/ $\epsilon$ 4 | $\epsilon$ 3/ $\epsilon$ 3 | $\epsilon$ 3/ $\epsilon$ 4 | $\epsilon$ 4/ $\epsilon$ 4 |
| N = 67      | 3.0                         | 61.0         | 24.0         | 0                          | 2.9<br>(2)                 | 1.4<br>(1)                 | 68.7<br>(46)               | 19.4<br>(13)               | 7.4<br>(5)                 |

**Table S2.** Missense mutation of the risk factor genes implicated in EOAD identified by NGS genetic analysis of the cases. Genome coverage with sequencing depth 90≥%. (NA: EOAD, early-onset Alzheimer's disease; NGS, next-generation sequencing; Not applicable; In SIFT prediction, T means tolerated, D means damaging, while in PolyPhen2, D means damaging, B means benign; N: Neutral)

| No. | Gene symbol   | Accession   | cDNA change | Protein change | Mutation frequency | SNP-ID      | KCDC frequency | ExAC frequency | PolyPhen2 HumDiv | Sift score | Provean   | Clinical significance                   |
|-----|---------------|-------------|-------------|----------------|--------------------|-------------|----------------|----------------|------------------|------------|-----------|-----------------------------------------|
| 1   | <i>S100A9</i> | NM_002965.3 | c.295G>A    | p.Gly99Lys     | 2/67               | rs143906646 | 0.009646       | 0.0006330      | 0.002 (B)        | 0.7 (T)    | -0.12 (N) | Probable benign variant                 |
| 2   | <i>CRI</i>    | NM_000573.3 | c.394A>C    | p.Thr132Pro    | 1/67               | rs55906048  | 0.001608       | 0.0004167      | 0.07 (B)         | 0.345 (T)  | -0.87 (N) | Probable benign variant                 |
|     |               |             | c.4973A>G   | p.His1658Arg   | 19/67              | rs2274567   | 0.204180       | 0.2510         | 0.98 (D)         | 0.89 (T)   | -1.81 (N) | Possible risk factor for AD             |
|     |               |             | c.5573C>T   | p.Thr1858Met   | 46/67              | rs3737002   | 0.425241       | 0.2750         | 0.995 (D)        | 0.019 (D)  | -0.83 (N) | Common variant, possible AD risk factor |
|     |               |             | c.6178A>T   | p.Thr2060Ser   | 67/67              | rs4844609   | 1              | 0.9853         | 0.95 (D)         | 0.019 (D)  | 0.55 (N)  | Common variant, possible AD risk factor |
|     |               |             | c.6193A>G   | p.Ile2065Val   | 21/67              | rs6691117   | 0.220257       | 0.3341         | 0.005 (B)        | 1 (T)      | 0.49 (N)  | Common variant, possible AD risk factor |
|     |               |             | c.6830C>G   | p.Pro2277Arg   | 20/67              | rs3811381   | 0.191318       | 0.2403         | 0.032 (B)        | 0.44 (T)   | -0.61 (N) | Probable benign variant                 |

|   |               |                    |           |              |       |             |           |            |              |              |              |                                          |
|---|---------------|--------------------|-----------|--------------|-------|-------------|-----------|------------|--------------|--------------|--------------|------------------------------------------|
|   |               |                    | c.7255A>G | p.Thr2419Ala | 61/67 | rs2296160   | 0.664791  | 0.8159     | 0.001<br>(B) | 0.98<br>(T)  | -0.10<br>(N) | Common variant                           |
| 3 | <b>BINI</b>   | NM_004305.3        | c.1292C>T | p.Pro431Leu  | 5/67  | rs141119288 | 0.015273  | 0.003413   | 0.99<br>(D)  | 0.07<br>(T)  | -2.26<br>(N) | Probably AD risk factor                  |
| 4 | <b>CLU</b>    | NM_001831.3        | c.380G>A  | p.Arg127His  | 1/67  | NA          | 0.000804  | 0.00004944 | 0.56<br>(D)  | 0.003<br>(D) | -0.65<br>(N) | Probably AD risk factor                  |
| 5 | <b>CTNNA3</b> | XM_00526971<br>7.1 | c.1787G>A | p.Ser596Asn  | 47/67 | rs4548513   | 0.431672  | 0.4120     | 0.001<br>(B) | 1<br>(T)     | 2.04<br>(N)  | Possible risk factor for LOAD and autism |
|   |               |                    | c.1850T>C | p.Ile617Thr  | 2/67  | NA          | 0.005627  | 0.0002645  | 0.928<br>(D) | 0.001<br>(D) | -2.86<br>(D) | Unknown significance                     |
|   |               |                    | c.2404G>T | p.Asp802Tyr  | 1/67  | NA          | Not found | 0.00005799 | 0.99(D)      | 0.001(D)     | -6.18<br>(D) | Unknown significance                     |
| 6 | <b>DNMBP</b>  | NM_015221.2        | c.2633C>T | p.Als878Val  | 1/67  | rs116707029 | 0.002412  | 0.00009060 | 0.67<br>(D)  | 0.035<br>(D) | -2.25<br>(N) | Unknown significance                     |
|   |               |                    | c.3154C>T | p.Arg1052Trp | 1/67  | rs115117818 | 0.002412  | 0.00009117 | 1<br>(D)     | 0.001<br>(D) | -5.30<br>(D) | Unknown significance                     |
|   |               |                    | c.3410G>A | p.Arg1137Gln | 1/67  | rs116296676 | 0.004019  | 0.0006096  | 0.99<br>(D)  | 0.006<br>(T) | -2.58<br>(D) | Unknown significance                     |
|   |               |                    | c.4138G>A | p.Glu1380Ser | 1/67  | rs148004684 | 0.003215  | 0.0006599  | 0.002<br>(B) | 0.94<br>(T)  | 0.55<br>(N)  | Unknown significance                     |
|   |               |                    | c.4239T>G | p.Cys1413Trp | 28/67 | rs11190305  | 0.261254  | 0.3442     | 0.094<br>(B) | 0.18<br>(T)  | -1.61<br>(N) | Common variant                           |

|   |              |             |           |              |       |             |           |            |              |              |              |                         |
|---|--------------|-------------|-----------|--------------|-------|-------------|-----------|------------|--------------|--------------|--------------|-------------------------|
| 7 | <b>SORL1</b> | NM_003105.5 | c.829G>C  | p.Val277Leu  | 1/67  | NA          | 0.003215  | 0.00002472 | 0.173<br>(B) | 0.01<br>(T)  | 0.75<br>(N)  | Unknown<br>significance |
|   |              |             | c.1528G>C | p.Glu511Arg  | 1/67  | NA          | Nor found | Nor found  | 0.99<br>(D)  | 0<br>(D)     | -2.86<br>(D) | AD risk factor          |
|   |              |             | c.1582G>A | p.Ala528Thr  | 21/67 | rs2298813   | 0.172830  | 0.07219    | 0.59<br>(D)  | 0.3<br>(T)   | 0.12<br>(N)  | AD risk factor          |
|   |              |             | c.2586T>G | p.Asp862Glu  | 1/67  | NA          | Not found | 0.0001318  | 0.178<br>(B) | 0.05<br>(D)  | 0<br>(N)     | Unknown                 |
|   |              |             | c.3220C>G | p.Glu1074Gln | 67/67 | rs1699107   | 1.000000  | 0.9949     | 0<br>(B)     | 0.16<br>(T)  | 0.42<br>(N)  | Common variant          |
|   |              |             | c.3476G>A | p.Arg1159Gln | 1/67  | rs527617199 | Not found | 0.00000864 | 0.62<br>(D)  | 0.45<br>(T)  | 0.12<br>(N)  | Unknown                 |
|   |              |             | c.4447A>G | p.Thr1483Ala | 1/67  | rs143286467 | 0.007235  | 0.001044   | 0.002<br>(D) | 0.3<br>(T)   | 0.12<br>(N)  | Unknown                 |
|   |              |             | c.4570G>A | p.Glu1524Arg | 3/67  | rs201415809 | 0.001608  | 0.0001813  | 0.99<br>(D)  | 0.005<br>(D) | -5.12<br>(D) | Unknown                 |
|   |              |             | c.5899A>G | p.Val1967Ile | 67/67 | rs1792120   | 0.998392  | 0.9953     | 0.003<br>(B) | 1<br>(T)     | 0.12<br>(N)  | Common,<br>unknown      |
|   |              |             | c.6289G>A | p.Val2097Ile | 1/67  | rs74642146  | 0.004019  | 0.001203   | 0.9<br>(D)   | 0.16<br>(T)  | 0.16<br>(N)  | Unknown                 |
| 8 | <b>BACE1</b> | NM_012104.4 | c.1141C>T | p.Cys481Arg  | 67/67 | rs539765    | 1.000000  | 0.9997     | 0<br>(B)     | 0.4<br>(T)   | 0.42<br>(N)  | Common mutation         |

|    |               |             |           |              |       |             |           |            |              |              |              |                                                |
|----|---------------|-------------|-----------|--------------|-------|-------------|-----------|------------|--------------|--------------|--------------|------------------------------------------------|
| 9  | <b>GAB2</b>   | NM_080491.2 | c.404G>T  | p.Glu135Val  | 3/67  | rs76853537  | 0.006431  | 0.009359   | 0.006<br>(B) | 0.5(<br>T)   | 0.46<br>(N)  | Unknown                                        |
|    |               |             | c.890C>T  | p.Thr297Met  | 2/67  | rs115318063 | 0.004823  | 0.0003378  | 0.05<br>(B)  | 0.08<br>(T)  | -1.99<br>(N) | Unknown                                        |
|    |               |             | c.950C>T  | p.Pro317Leu  | 2/67  | rs116286425 | 0.032154  | 0.001978   | 0.998<br>(D) | 0.01<br>(D)  | -4.29<br>(D) | Unknown                                        |
| 10 | <b>LRP6</b>   | NM_002336.2 | c.379T>A  | p.Ser127Thr  | 3/67  | rs17848270  | 0.040193  | 0.001980   | 0.001<br>(B) | 0.8<br>(T)   | -0.08<br>(N) | Unknown                                        |
|    |               |             | c.427A>G  | p.Ile143V    | 1/67  | NA          | Not found | 0.00000834 | 0.93<br>(D)  | 0.13<br>(T)  | -0.65<br>(N) | Unknown                                        |
|    |               |             | c.2902C>T | p.R968Trp    | 1/67  | NA          | Not found | 0.00000823 | 0.99<br>(D)  | 0.001<br>(D) | -5.49<br>(D) | Unknown                                        |
|    |               |             | c.3184G>A | p.Val1062Ile | 67/67 | rs2302685   | 0.922830  | 0.8474     | 0<br>(B)     | 1<br>(T)     | 0.96<br>(N)  | Common<br>mutation, possible<br>AD risk factor |
| 11 | <b>ADAM10</b> | NM_001110.2 | c.763A>G  | p.Thr255Ala  | 2/67  | rs147572059 | 0.005627  | 0.0007415  | 0.004<br>(B) | 0.88<br>(T)  | 0.36<br>(N)  | Unknown                                        |
|    |               |             | c.1661A>G | p.Asp554Gly  | 1/67  | NA          | Not found | Not found  | 0.02<br>(B)  | 0.377<br>(T) | -1.32<br>(N) | Unknown                                        |
| 12 | <b>ABCA7</b>  | NM_019112.3 | c.563A>G  | p.Glu188Gly  | 46/67 | rs3764645   | 0.428457  | 0.4838     | 0.06<br>(B)  | 0.67<br>(T)  | -0.87<br>(N) | Unknown                                        |
|    |               |             | c.955A>G  | p.Thr319Ala  | 11/67 | rs3752232   | 0.094052  | 0.06039    | 0.142<br>(B) | 0.446<br>(T) | 1.03<br>(N)  | Possible AD risk<br>factor                     |

|  |  |  |            |              |       |             |           |            |              |              |              |                            |
|--|--|--|------------|--------------|-------|-------------|-----------|------------|--------------|--------------|--------------|----------------------------|
|  |  |  | c.1184A>G  | p.His395Arg  | 9/67  | rs3764647   | 0.099679  | 0.06298    | 0.02<br>(B)  | 1<br>(T)     | 0.11<br>(N)  | Possible AD risk factor    |
|  |  |  | c.1384G>C  | p.Val462Leu  | 1/67  | NA          | Not found | Not found  | 0.08<br>(B)  | 0.086<br>(T) | -1.92<br>(N) | Unknown                    |
|  |  |  | c.1388G>A  | p.Arg463His  | 18/67 | rs3752233   | 0.163183  | 0.04775    | 0.8<br>(D)   | 0.25<br>(T)  | -2.89<br>(D) | Unknown                    |
|  |  |  | c.1620delC | p.Asp540fs   | 1/67  | NA          | 0.0008    | 0.00002735 | NA           | NA           | NA           | Unknown                    |
|  |  |  | c.1570C>T  | p.Arg524Trp  | 1/67  | NA          | 0.001608  | 0.0002259  | 0.75<br>(D)  | 0.01<br>(D)  | -3.25<br>(D) | Unknown                    |
|  |  |  | c.1832T>G  | p.Val611Gly  | 1/67  | NA          | 0.000804  | 0.0001286  | 0.97<br>(D)  | 0.004<br>(D) | -4.34<br>(D) | Unknown                    |
|  |  |  | c.2153A>C  | p.Asn718Thr  | 20/67 | rs3752239   | 0.154341  | 0.07028    | 0.58<br>(D)  | 0.24<br>(T)  | -5.17<br>(D) | Unknown                    |
|  |  |  | c.2892C>G  | p.Asp964Glu  | 2/67  | rs117390715 | 0.008039  | 0.001506   | 1<br>(D)     | 0<br>(D)     | -3.61<br>(D) | Unknown                    |
|  |  |  | c.2923C>T  | p.Arg975Cys  | 1/67  | NA          | 0.000804  | 0.0001787  | 1<br>(D)     | 0<br>(D)     | -7.25<br>(D) | Unknown                    |
|  |  |  | c.3629G>A  | p.Arg1210Gln | 1/67  | NA          | NA        | 0.00009019 | 0.006<br>(B) | 1<br>(T)     | 0.66<br>(N)  | Unknown                    |
|  |  |  | c.3641G>A  | p.Trp1214*   | 1/67  | NA          | 0.004823  | 0.0005178  | NA           | NA           | NA           | AD risk factor, stop codon |



|           |              |       |             |           |            |              |              |              |                             |
|-----------|--------------|-------|-------------|-----------|------------|--------------|--------------|--------------|-----------------------------|
| c.4046G>A | p.Trp1349Gln | 35/67 | rs3745842   | 0.366559  | 0.4433     | 0.004<br>(B) | 0.54<br>(T)  | 0.05<br>(N)  | Common variant,<br>unknown  |
| c.4211A>G | p.Lys1404Arg | 1/66  | NA          | Not found | Not found  | 0.03<br>(B)  | 0.002<br>(D) | -2.14<br>(N) | Unknown                     |
| c.4580G>C | p.Gly1527Ala | 58/67 | rs3752246   | 0.661576  | 0.8405     | 0<br>(B)     | 0.87<br>(T)  | 2.70<br>(N)  | Common variant,<br>unknown  |
| c.5057A>G | p.Gln1686Arg | 16/67 | rs4147918   | 0.150322  | 0.04785    | 0.004<br>(B) | 0.23<br>(T)  | -0.44<br>(N) | Common variant,<br>unknown  |
| c.5069T>C | p.Ile1690Thr | 2/67  | rs184218896 | 0.017685  | 0.0002979  | 0.911<br>(D) | 0.001<br>(T) | -3.74<br>(D) | Unknown                     |
| c.5339G>A | p.Arg1780Qln | 2/67  | NA          | 0.001608  | 0.00009783 | 0.88<br>(D)  | 0.002<br>(D) | -3.63<br>(D) | Unknown                     |
| c.5609G>T | p.Gly1870Val | 1/67  | NA          | Not found | 0.00000839 | 0.99<br>(D)  | 0<br>(D)     | -8.31<br>(D) | Unknown                     |
| c.5692C>T | p.Pro1898Ser | 1/67  | NA          | Not found | 0.00000849 | 0.9<br>(D)   | 0.08<br>(T)  | -7.38<br>(D) | Unknown                     |
| c.5789A>G | p.Asn1930Ser | 1/67  | NA          | Not found | Not found  | 0.98<br>(D)  | 0.002<br>(D) | -4.27<br>(D) | Unknown                     |
| c.5963G>T | p.Cys1988Phe | 1/67  | rs142573667 | 0.001608  | 0.0004807  | 1<br>(D)     | 0<br>(D)     | -9.39<br>(D) | Unknown                     |
| c.6133G>T | p.Ala2045Ser | 45/67 | rs4147934   | 0.422830  | 0.7317     | 0.051<br>(B) | 0.96<br>(T)  | 0.06<br>(N)  | Common mutation,<br>unknown |

|    |             |             |           |              |       |             |          |           |              |              |              |                          |
|----|-------------|-------------|-----------|--------------|-------|-------------|----------|-----------|--------------|--------------|--------------|--------------------------|
|    |             |             | c.6633G>T | p.Phe2071Cys | 2/67  | NA          | 0.006431 | 0.002584  | 0.5<br>(B)   | 0.46<br>(T)  | -6.84<br>(D) | Common mutation, unknown |
| 13 | <b>CD33</b> | NM_001772.3 | c.41C>T   | p.Ala14Val   | 26/67 | rs12459419  | 0.174437 | 0.2939    | 0.023<br>(B) | 0.08<br>(T)  | -2.12<br>(N) | AD risk factor           |
|    |             |             | c.205A>G  | p.Arg69Gly   | 4/67  | rs2455069   | 0.058682 | 0.3577    | 0.009<br>(B) | 0.33<br>(T)  | -2.36<br>(N) | Unknown                  |
|    |             |             | c.594A>G  | p.Ile1198Met | 1/67  | rs200827254 | 0.009646 | 0.0008239 | 0.105<br>(B) | 0.006<br>(T) | -0.03<br>(N) | Unknown                  |
|    |             |             | c.880G>T  | p.Val294Leu  | 1/67  | rs2271652   | 0.010450 | 0.0008755 | 0.001<br>(B) | 0.16<br>(T)  | -1.11<br>(N) | Unknown                  |

**Table S3.** Missense mutation of other dementia genes implicated in EOAD identified by NGS genetic analysis of the cases. Genome coverage with sequencing depth 90≥%. (NA: Not applicable; In SIFT prediction, T means tolerated, D means damaging, while in PolyPhen2, D means damaging, B means benign)

| No. | Gene symbol            | Accession    | cDNA change | Protein change | Mutation frequency | SNP-ID      | KCDC frequency | ExAC frequency | PolyPhen2 HumDiv | Sift score | Provean   | Clinical significance |
|-----|------------------------|--------------|-------------|----------------|--------------------|-------------|----------------|----------------|------------------|------------|-----------|-----------------------|
| 1   | <b>PINK1</b>           | NM_032409.2  | c.755A>T    | p.Glu252Val    | 1/67               | NA          | Not found      | Not found      | 0.605 (D)        | 0.05 (D)   | -3.91 (D) | Unknown               |
|     |                        |              | c.1018G>A   | p.Ala340Thr    | 38/67              | rs3738136   | 0.305466       | 0.09211        | 0.001 (B)        | 1 (T)      | 1.34 (N)  | Unknown               |
|     |                        |              | c.1562A>C   | p.Asn521Thr    | 47/67              | rs1043424   | 0.377010       | 0.09211        | 0.005 (B)        | 0.24 (T)   | -0.94 (N) | Unknown               |
| 2   | <b>PARK7</b>           | NM_007262.4  | c.535G>A    | p.Ala179Thr    | 1/67               | rs71653622  | 0.002412       | 0.0006193      | 0.001 (B)        | 0.56 (T)   | -0.15 (N) | Unknown               |
| 3   | <b>ATP13A2 (PARK9)</b> | NC_000001.11 | c.317A>G    | p.Glu106Arg    | 1/67               | NA          | Not found      | Not found      | 0.008 (B)        | 0.47 (T)   | -0.29 (N) | Unknown               |
|     |                        |              | c.1499G>T   | p.Arg500Leu    | 1/67               | NA          | Not found      | Not found      | 1 (D)            | 0 (D)      | -5.27 (D) | Unknown               |
|     |                        |              | c.1817C>G   | p.Pro606Arg    | 1/67               | NA          | Not found      | Not found      | 0.93 (D)         | 0.025 (D)  | -4.44 (D) | Unknown               |
| 4   | <b>SNCA</b>            | NM_001146055 | c.381G>A    | p.Met127Ile    | 1/67               | rs191055637 | 0.007235       | 0.00009900     | 0.77 (D)         | 0.16 (T)   | -0.57 (N) | Unknown               |

|            |              |             |            |              |        |             |             |              |                         |              |              |                            |
|------------|--------------|-------------|------------|--------------|--------|-------------|-------------|--------------|-------------------------|--------------|--------------|----------------------------|
| 5          | <b>PARK2</b> | NM_004562.2 | c.500G>A   | p.Ser167Asn  | 45/67  | rs1801474   | 0.456592    | 0.06758      | 0.03<br>(B)             | 0.31<br>(T)  | -1.45<br>(N) | Benign variant             |
|            |              |             | c.799T>C   | p.Tyr267His  | 1/67   | rs114696251 | 0.000804    | 0.0001995    | 0.99<br>(D)             | 0<br>(D)     | -4.21<br>(D) | Unknown                    |
|            |              |             | c.1138G>C  | p.Val380Leu  | 4/67   | rs1801582   | 0.044212    | 0.1646       | 0<br>(B)                | 0.37<br>(T)  | -0.09<br>(N) | Benign variant             |
| 6          | <b>LRRK2</b> | NM_198578.3 | c.691T>C   | p.Ser231Pro  | 1/67   | rs201332859 | 0.000804    | 0.00004977   | 0.004<br>(B)            | 0.3<br>(T)   | 0.00<br>(N)  | Unknown                    |
|            |              |             | c.1256C>T  | p.Ala419Val  | 2/67   | rs34594498  | 0.015273    | 0.0000083    | 0.49<br>(D)             | 0.03<br>(D)  | -1.18<br>(N) | PD risk factor             |
|            |              |             | c.1598T>C  | p.Val533Ala  | 1/67   | NA          | 0.000804    | 0.0000082    | 0.5<br>(T)              | 0.004<br>(D) | -1.89<br>(N) | Unknown                    |
|            |              |             | c.1653C>G  | p.Asn551Leu  | 16/67  | rs7308720   | 0.152733    | 0.08607      | 0.005<br>(D)            | 0.972<br>(D) | -2.63<br>(D) | Possible PD<br>risk factor |
|            |              |             | c.2167A>G  | p.Ile723Val  | 2/67   | rs10878307  | 0.008842    | 0.05922      | 0.001<br>(B)            | 0.68<br>(T)  | -0.02<br>(N) | Possible PD<br>risk factor |
|            |              |             | c.4193G>A  | p.Arg1398His | 14/67  | rs7133914   | 0.136656    | 0.08412      | 0.58<br>(D)             | 0.1<br>(T)   | -1.19<br>(N) | Possible PD<br>risk factor |
|            |              |             | c.4337C>T  | p.Pro1446Leu | 2/67   | rs74681492  | 0.004823    | 0.0002473    | 1<br>(D)                | 0.008<br>(T) | -5.55<br>(D) | Possible risk<br>factor    |
| c.4939T>A, | p.Ser1647Thr | 29/67       | rs11564148 | 0.260450     | 0.2983 | 0<br>(B)    | 0.95<br>(T) | -0.15<br>(N) | Possible risk<br>factor |              |              |                            |

|    |                       |              |           |              |       |             |           |            |              |              |              |                                |
|----|-----------------------|--------------|-----------|--------------|-------|-------------|-----------|------------|--------------|--------------|--------------|--------------------------------|
|    |                       |              | c.7153G>A | p.Gly2385Arg | 6/67  | rs34778348  | 0.016077  | 0.1129     | 0.013<br>(B) | 0.4<br>(T)   | 0.25<br>(N)  | Possible PD<br>risk factor     |
|    |                       |              | c.7190T>C | p.Met2397Thr | 43/67 | rs3761863   | 0.418810  | 0.6240     | 0<br>(B)     | 0.466<br>(T) | -0.53<br>(N) | Possible PD<br>risk factor     |
| 7  | <b>SIGMARI</b>        | XM_005251339 | c.5A>C    | p.Gln2Pro    | 42/67 | rs1800866   | 0.319936  | 0.1840     | 0<br>(B)     | 0.343<br>(T) | 0.03<br>(N)  | Possible risk<br>factor        |
|    |                       |              | c.622C>T  | p.Arg208Trp  | 5/67  | rs11559048  | 0.024920  | 0.007782   | 0.94<br>(D)  | 0.01<br>(D)  | -4.42<br>(D) | Unknown                        |
|    |                       |              | c.632G>A  | p.Arg211Gln  | 1/67  | rs192644838 | 0.024920  | 0.00009934 | 0.57<br>(D)  | 0.29<br>(T)  | -0.28<br>(N) | Unknown                        |
| 8  | <b>FUS</b>            | NM_004960.3  | c.451C>T  | p.Pro151Ser  | 1/67  | NA          | Not found | 0.00000823 | 0.007<br>(B) | 0.03<br>(D)  | -1.39<br>(N) | Unknown                        |
| 9  | <b>GRN<br/>(PGRN)</b> | NM_002087.2  | c.119G>A  | p.Ser40Asn   | 1/67  | NA          | Not found | Not found  | 0.75<br>(D)  | 0.015<br>(D) | -1.02<br>(N) | Probable novel<br>mutation     |
|    |                       |              | c.1690C>T | p.Arg564Cys  | 1/67  | NA          | Not found | 0.00000830 | 0.87<br>(D)  | 0.04<br>(D)  | -2.88<br>(D) | AD risk factor<br>mutation     |
| 10 | <b>MAPT</b>           | NM_001203251 | c.418C>T  | p.Pro140Ser  | 2/67  | rs151115928 | 0.007235  | 0.0007273  | 0.846<br>(D) | 0.04<br>(D)  | -1.00<br>(N) | Unknown                        |
|    |                       |              | c.1321T>C | p.Tyr441His  | 59/67 | rs112757188 | Not found | 0.2752     | 0<br>(B)     | 0.97<br>(T)  | 1.23<br>(N)  | Common<br>mutation,<br>unknown |

|    |              |              |                       |              |       |             |           |                 |               |              |              |                                |
|----|--------------|--------------|-----------------------|--------------|-------|-------------|-----------|-----------------|---------------|--------------|--------------|--------------------------------|
| 11 | <b>TAF15</b> | NC_000017.11 | G /<br>GGGCAGA<br>GGA | Gly444fs     | 1/67  | NA          | Not found | 0.00000996<br>4 | NA            | NA           | NA           | Unknown                        |
| 12 | <b>ALS2</b>  | NM_020919.3  | c.475G>A              | p.Glu159Lys  | 2/67  | NA          | 0.004019  | 0.006714        | 0.156<br>(B)  | 0.15<br>(T)  | -1.04<br>(N) | Unknown                        |
|    |              |              | c.1102G>A             | p.Val368Met  | 67/67 | NA          | 1.000000  | 0.9106          | 0.009<br>(B)  | 0.191<br>(T) | -0.06<br>(N) | Common<br>mutation,<br>unknown |
|    |              |              | c.2278C>G             | p.Leu760Val  | 1/67  | NA          | 0.000804  | 0.00000834      | 0.99<br>(D)   | 0.14<br>(T)  | -1.47<br>(N) | Unknown                        |
|    |              |              | c.2953C>T             | p.Leu985Phe  | 1/67  | rs41308836  | 0.000804  | 0.00002488      | 0.0953<br>(D) | 0.005<br>(D) | -1.86<br>(N) | Unknown                        |
|    |              |              | c.3517G>A             | p.Glu1173Leu | 4/67  | rs41309046  | 0.000804  | 0.002211        | 0.8 (D)       | 0.003(D)     | -3.41 (D)    | Unknown                        |
|    |              |              | c.4892A>G             | p.Tyr1631Cys | 1/67  | NA          | Not found | Not found       | 0.003<br>(D)  | 0.18<br>(T)  | -0.15<br>(N) | Unknown                        |
| 13 | <b>FIG4</b>  | NM_014845.5  | c.658A>G              | p.Ile220Val  | 1/67  | rs565096937 | Not found | 0.0002883       | 0.45<br>(T)   | 0.004<br>(T) | -0.02<br>(N) | Unknown                        |
|    |              |              | c.1090A>T             | p.Met364Leu  | 28/67 | rs2295837   | 0.221061  | 0.07428         | 0.001<br>(B)  | 1<br>(T)     | 1.11<br>(N)  | Benign                         |
|    |              |              | c.1961T>C             | p.Val654Ala  | 34/67 | rs9885672   | 0.354502  | 0.2753          | 0<br>(B)      | 0.3<br>(T)   | 0.95<br>(N)  | Mutation                       |

|    |                |              |           |              |       |             |           |            |              |              |              |                         |
|----|----------------|--------------|-----------|--------------|-------|-------------|-----------|------------|--------------|--------------|--------------|-------------------------|
| 14 | <b>OPTN</b>    | XM_005252335 | c.293T>A  | p.Met98Lys   | 16/67 | rs11258194  | 0.080386  | 0.04519    | 0.04<br>(B)  | 0.92<br>(T)  | -0.06<br>(N) | Involved in<br>glaucoma |
|    |                |              | c.964G>A  | p.Glu322Lys  | 67/67 | rs523747    | 0.998392  | 0.9973     | 0<br>(B)     | 1<br>(T)     | 1.93<br>(N)  | Unknown                 |
|    |                |              | c.1634G>A | p.Arg545Asn  | 4/67  | rs75654767  | 0.043408  | 0.002902   | 0<br>(B)     | 1<br>(T)     | 1.52<br>(N)  | Risk for<br>glaucoma    |
| 15 | <b>DAO</b>     | NM_001917.4  | c.489A>C  | p.Leu163Asn  | 3/67  | NA          | Not found | Not found  | 0.97<br>(D)  | 0.002<br>(D) | -4.11<br>(D) | Unknown                 |
| 16 | <b>HNRNPA1</b> | XR_245923.1  | c.631G>A  | p.Gly211Ser  | 1/67  | rs182937540 | 0.006431  | 0.001156   | 0.05<br>(B)  | 0.22<br>(T)  | -2.45<br>(N) | Unknown                 |
| 17 | <b>SPAST</b>   | XM_005264516 | c.155A>G  | p.Tyr52Cys   | 1/67  | NA          | Not found | 0.00001712 | 0.52<br>(D)  | 0.015<br>(D) | -0.54<br>(N) | Unknown                 |
| 18 | <b>SPG11</b>   | NM_025137.3  | c.437A>G  | p.Asn146Gly  | 1/67  | rs182535774 | 0.004019  | 0.0004448  | 0.01<br>(B)  | 0.7<br>(T)   | -0.32<br>(N) | Unknown                 |
|    |                |              | c.833A>G  | p.Asn278Ser  | 10/67 | NA          | 0.074759  | 0.007759   | 0.01<br>(B)  | 0.45<br>(T)  | -0.85<br>(N) | Unknown                 |
|    |                |              | c.1388T>C | p.Phe463Ser  | 62/67 | rs3759871   | 0.479100  | 0.4657     | 0.009<br>(B) | 0.341<br>(B) | -1.27<br>(N) | Unknown                 |
|    |                |              | c.3206A>G | p.Gln1069Arg | 1/67  | NA          | Not found | Not found  | 0.74<br>(D)  | 0.03<br>(D)  | -1.59<br>(N) | Unknown                 |
|    |                |              | c.6892A>G | p.Ile2298V   | 4/67  | rs147962000 | 0.017685  | 0.001040   | 0.05<br>(B)  | 0.6<br>(T)   | 0.11<br>(N)  | Unknown                 |

|    |               |             |           |             |       |            |           |            |              |              |              |                                              |
|----|---------------|-------------|-----------|-------------|-------|------------|-----------|------------|--------------|--------------|--------------|----------------------------------------------|
| 19 | <b>CSF1R</b>  | NM_005211.3 | c.544G>T  | p.Gly182Cys | 1/67  | NA         | 0.001608  | 0.00006594 | 0.782<br>(D) | 0.01<br>(D)  | -3.18<br>(D) | Unknown                                      |
|    |               |             | c.635T>A  | p.Leu212Gln | 1/67  | NA         | Not found | Not found  | 0.2<br>(D)   | 0.14<br>(T)  | -0.43<br>(N) | Possible novel variant                       |
|    |               |             | c.637G>A  | p.Val213etM | 1/67  | NA         | Not found | 0.00000824 | 0.93<br>(D)  | 0.001<br>(D) | -1.58<br>(N) | Unknown                                      |
|    |               |             | c.733G>T  | p.Ala245Thr | 1/67  | rs41338945 | 0.000804  | 0.00005022 | 0.008<br>(B) | 0.6<br>(T)   | 0.37<br>(N)  | Unknown                                      |
|    |               |             | c.835G>A  | p.Val279Met | 3/67  | rs3829986  | 0.044212  | 0.002537   | 0.19<br>(B)  | 0.11<br>(T)  | -0.66<br>(N) | Unknown                                      |
|    |               |             | c.1085A>G | p.His362Arg | 40/67 | rs10079250 | 0.290193  | 0.00009984 | 0.15<br>(B)  | 0.06<br>(T)  | -3.36<br>(D) | Common mutation, possible cancer risk factor |
|    |               |             | c.2806G>A | p.Gly936Ser | 1/67  | NA         | Not found | Not found  | 0.78<br>(D)  | 0.01<br>(D)  | -0.28<br>(N) | Possible novel variant                       |
| 20 | <b>NOTCH3</b> | NM_000435.2 | c.709G>A  | p.Val237Met | 1/67  | rs2285981  | 0.000804  | 0.00000844 | 0.25<br>(B)  | 0.001<br>(D) | -2.22<br>(N) | Unknown                                      |
|    |               |             | c.2208C>A | p.Asp736Glu | 1/67  | NA         | Not found | Not found  | 0.97<br>(D)  | 0.004<br>(T) | -2.01<br>(N) | Unknown                                      |
|    |               |             | c.2320C>G | p.Pro774Ala | 1/67  | NA         | Not found | 0.00009441 | 0.99<br>(D)  | 0.004<br>(T) | -5.88<br>(D) | Unknown                                      |



|    |             |                    |           |              |       |             |           |            |              |              |              |                               |
|----|-------------|--------------------|-----------|--------------|-------|-------------|-----------|------------|--------------|--------------|--------------|-------------------------------|
|    |             |                    | c.2519G>A | p.Gly840Glu  | 1/67  | NA          | 0.000804  | 0.00004135 | 1<br>(D)     | 0.001<br>(D) | -6.91<br>(D) | Unknown                       |
|    |             |                    | c.3523C>T | p.Arg1175Trp | 1/67  | rs200504060 | 0.012058  | 0.001047   | 0.91<br>(D)  | 0.004<br>(D) | -5.05<br>(D) | Unknown                       |
|    |             |                    | c.3620A>G | p.Asn1207Ser | 2/67  | rs141418355 | 0.000804  | 0.00004172 | 0.99<br>(D)  | 0.002<br>(D) | -4.58<br>(D) | Unknown                       |
|    |             |                    | c.4348G>A | p.Ala1450Thr | 2/67  | NA          | 0.004019  | 0.0002155  | 0.61<br>(D)  | 0.11<br>(T)  | -1.81<br>(N) | Unknown                       |
|    |             |                    | c.6678C>T | p.Ala2223Val | 55/67 | rs1044009   | 0.590032  | 0.7591     | 0.003<br>(B) | 0.14<br>(T)  | -1.46<br>(N) | Common mutation               |
| 21 | <b>PRNP</b> | NM_001080121<br>.1 | c.385A>G  | p.Met129Val  | 1/67  | rs1799990   | 0.024920  | 0.3078     | 0.012<br>(B) | 0.024<br>(D) | -0.66<br>(N) | Pathogenic nature complicated |
|    |             |                    | c.655G>A  | p.Glu219Lys  | 7/67  | rs1800014   | 0.057074  | 0.008728   | 0.003<br>(B) | 0.035<br>(D) | 0.00<br>(N)  | Pathogenic nature complicated |
|    |             |                    | c.674A>G  | p.Tyr225Cys  | 1/67  | NA          | Not found | 0.00000830 | 0.98<br>(D)  | 0.001<br>(D) | -1.13<br>(N) | May be involved in CJD        |
|    |             |                    | c.695T>G  | p.Met232Arg  | 1/67  | rs74315409  | 0.001608  | 0.00008521 | 0.707<br>(D) | 0.001<br>(D) | -1.20<br>(N) | CJD or AD involvement         |

**Table S4.** Clinical information of the patients associated with rare mutations. (AOO: age of onset; NA: Not applicable; M: male; F: female; AD: Alzheimer's disease; EOAD: early onset Alzheimer's disease)

| Subject No. | Gender | AOO | APOE status | Diagnosed | Family History    | Common mutation | Rare mutation | Rare mutations                                                                                                                  |
|-------------|--------|-----|-------------|-----------|-------------------|-----------------|---------------|---------------------------------------------------------------------------------------------------------------------------------|
| 1.          | M      | 64  | ε23         | AD        | Negative          | 24              | 1             | <i>ADAM10</i> p.Thr255Ala                                                                                                       |
| 2.          | M      | 60  | ε34         | AD        | Negative          | 21              | 1             | <i>NOTCH3</i> p.Ala1927Thr                                                                                                      |
| 3.          | F      | 62  | ε33         | AD        | Negative          | 24              | 1             | <i>NOTCH3</i> p.Ala1450Thr                                                                                                      |
| 4.          | F      | 51  | ε33         | AD        | Negative          | 25              | 1             | <i>HNRNPA1</i> p.Gly211Ser                                                                                                      |
| 5.          | F      | 52  | ε34         | AD        | Negative          | 33              | 5             | <i>ABCA7</i> p.Arg1780Gln, <i>GAB2</i> p.Gln135Val, <i>LRP6</i> p.Ser127Thr, <i>LRRK2</i> p.Gln2385Arg, <i>PRNP</i> p.Glu219Leu |
| 6.          | F      | 61  | ε33         | AD        | Positive (mother) | 26              | 1             | <i>NOTCH3</i> p.Asn1207Ser                                                                                                      |
| 7.          | M      | 59  | ε33         | AD        | Negative          | 32              | 1             | <i>ABCA7</i> p.Arg1790Gln                                                                                                       |
| 8.          | M      | 55  | ε33         | EOAD      | Negative          | 22              | 2             | <i>SORL1</i> p.Arg1159Gln, <i>NOTCH3</i> p.Leu1518Met, <i>TAF15</i> p.Gln444fs                                                  |
| 9.          | F      | 53  | ε33         | EOAD      | NA                | 23              | 4             | <i>ALS2</i> p.Leu985Phe, <i>CSF1R</i> p.Val279Met, <i>OPTN</i> p.Arg545Gln, <i>SPG11</i> p.Ile2298Val                           |

|     |   |    |     |      |                      |    |   |                                                                                                                            |
|-----|---|----|-----|------|----------------------|----|---|----------------------------------------------------------------------------------------------------------------------------|
| 10. | M | 65 | ε34 | EOAD | Positive<br>(father) | 30 | 1 | <i>ABCA7</i> p.Ile1690Thr                                                                                                  |
| 11. | F | 65 | ε44 | AD   | NA                   | 27 | 5 | <i>PRNP</i> p.Glu219Lys, <i>GRN</i> p.Arg564Cys, <i>FUS</i> p.Pro151Ser, <i>SPG11</i> p.Asn278Ser, <i>SPAST</i> p.Tyr52Cys |
| 12. | F | 60 | ε33 | EOAD | NA                   | 28 | 1 | <i>PRNP</i> p.Glu219Lys                                                                                                    |
| 13. | F | 59 | ε34 | AD   | Negative             | 25 | 2 | <i>ALS2</i> p.Glu159Lys, <i>LRRK2</i> p.Val533Ala                                                                          |
| 14. | M | 59 | ε33 | AD   | Positive<br>(father) | 24 | 3 | <i>CTNNA3</i> p.Asp802Tyr, <i>ABCA7</i> p.Ile1690Thr, <i>NOTCH3</i> p.Asn1207Ser                                           |
| 15. | F | 63 | ε33 | EOAD | NA                   | 20 | 1 | <i>PINK1</i> p.Glu252Val                                                                                                   |
| 16. | F | 61 | ε33 | EOAD | NA                   | 28 | 3 | <i>NOTCH3</i> p.Gly1779Val, <i>CTNNA3</i> p.Ile617Thr, <i>LRRK2</i> p.Gly2385Arg                                           |
| 17. | F | 62 | ε33 | AD   | NA                   | 25 | 3 | <i>CSF1R</i> p.Leu212Gln, p.Val213Met, <i>SPG11</i> p.Ile2298Val                                                           |
| 18. | M | 64 | ε34 | EOAD | NA                   | 22 | 3 | <i>CR1</i> p.Thr132Pro, <i>SIGMAR1</i> p.Arg211Gln, <i>NOTCH3</i> p.Ala1450Thr                                             |
| 19. | F | 60 | ε34 | AD   | Positive<br>(mother) | 26 | 1 | <i>LRRK2</i> p.Pro1446Leu                                                                                                  |
| 20. | M | 55 | ε33 | AD   | Negative             | 23 | 2 | <i>ABCA7</i> p.Asp964Glu, p.Phe2071Cys                                                                                     |
| 21. | F | 54 | ε33 | AD   | Negative             | 27 | 3 | <i>GAB2</i> p.Thr297Met, <i>LRRK2</i> p.Ala419Val, <i>SPG11</i>                                                            |

|     |   |    |     |      |                   |    |   |                                                                                                     |
|-----|---|----|-----|------|-------------------|----|---|-----------------------------------------------------------------------------------------------------|
|     |   |    |     |      |                   |    |   | p.Asn278Ser                                                                                         |
| 22. | F | 49 | ε34 | AD   | Negative          | 28 | 3 | <i>SORL1</i> p.Val277Leu, <i>LRRK2</i> p.Ala419Val, p.Ile1967Val, <i>ABCA7</i> p.Val611Gly          |
| 23. | F | 50 | ε34 | EOAD | Negative          | 26 | 2 | <i>ABCA7</i> p.Gly1870Val, <i>LRRK2</i> p.Gly2385Arg                                                |
| 24. | M | 59 | ε33 | EOAD | Negative          | 19 | 4 | <i>BINI</i> p.Pro431Leu, <i>LRP6</i> p.Ser127Thr, <i>MAPT</i> p.Asp177Val, <i>ABCA7</i> p.Arg524Trp |
| 25. | F | 53 | ε33 | EOAD | Negative          | 35 | 1 | <i>ABCA7</i> p.Lys1404Arg                                                                           |
| 26. | F | 65 | ε33 | AD   | Negative          | 23 | 3 | <i>LRRK2</i> p.Gly2385Arg, <i>ABCA7</i> p.Cys1988Phe, <i>NOTCH3</i> p.Pro2215Ser                    |
| 27. | F | 65 | ε33 | AD   | Positive          | 27 | 4 | <i>SNCA</i> p.Met127Ile, <i>CSF1R</i> p.Val279Met, <i>SPG11</i> p.Asn278Ser, <i>GRN</i> p.Ser40Asn  |
| 28. | M | 50 | ε24 | EOAD | Positive          | 26 | 1 | <i>BINI</i> p.Pro431Leu                                                                             |
| 29. | F | 60 | ε33 | AD   | Positive (mother) | 23 | 2 | <i>OPTN</i> p.Arg545Gln, <i>SQSTM1</i> p.Arg415Trp                                                  |
| 30. | M | 59 | ε44 | EOAD | NA                | 22 | 1 | <i>OPTN</i> p.Arg545Gln                                                                             |
| 31. | F | 63 | ε33 | EOAD | Negative          | 26 | 1 | <i>LRRK2</i> p.Ser231Pro                                                                            |
| 32. | M | 57 | ε33 | AD   | Negative          | 20 | 1 | <i>LRRK2</i> p.Gly2385Arg                                                                           |
| 33. | F | 52 | ε33 | EOAD | Negative          | 27 | 2 | <i>SORL1</i> p.Cys481Arg, <i>ADAM10</i> p.Asn554Gly                                                 |

|     |   |    |     |      |                   |    |   |                                                                                                                                                 |
|-----|---|----|-----|------|-------------------|----|---|-------------------------------------------------------------------------------------------------------------------------------------------------|
| 34. | F | 55 | ε33 | EOAD | NA                | 27 | 2 | <i>SIGMAR1</i> p.Ar208Trp, <i>ABCA7</i> p.Pro1898Ser                                                                                            |
| 35. | F | 51 | ε33 | AD   | Negative          | 23 | 5 | <i>BINI</i> p.Pro431Leu, <i>FIG4</i> p.Ile220Val, <i>ALS2</i> p.Glu1173Lys, <i>SORL1</i> p.Asn862Glu, <i>PRNP</i> p.Met232Arg                   |
| 36. | F | 48 | ε33 | EOAD | Negative          | 24 | 1 | <i>SPG11</i> p.Asn278Ser                                                                                                                        |
| 37. | F | 59 | ε33 | EOAD | Positive (mother) | 25 | 6 | <i>CSF1R</i> p.Gly182Cys, <i>SQSTM1</i> p.Arg415Trp, <i>SORL1</i> p.Val2097Ile, <i>LRRK2</i> p.Gly2385Arg, <i>CD33</i> p.Ile198Met, p.Val294Leu |
| 38. | M | 57 | ε34 | AD   | Positive (mother) | 19 | 1 | <i>SIGMAR1</i> p.Arg208Trp                                                                                                                      |
| 39. | F | 64 | ε33 | AD   | Negative          | 26 | 1 | <i>PSEN1</i> p.Thr119Ile                                                                                                                        |
| 40. | M | 64 | ε34 | EOAD | Negative          | 23 | 3 | <i>BINI</i> p.Pro431Leu, <i>ALS2</i> p.Glu159Lys, <i>SORL1</i> p.Gly511Arg, <i>PRNP</i> p.Glu219Lys                                             |
| 41. | F | 64 | ε33 | AD   | NA                | 25 | 2 | <i>ALS2</i> p.Tyr1631Cys, <i>ADAM10</i> p.Thr255Ala, <i>PRNP</i> p.Glu219Lys                                                                    |
| 42. | F | 53 | ε34 | EOAD | Negative          | 24 | 1 | <i>SPG11</i> p.Ile2298Val                                                                                                                       |
| 43. | M | 53 | ε44 | AD   | Not checked       | 25 | 3 | <i>ABCA7</i> p.Asp504fs, <i>LRP6</i> p.Arg968Trp, <i>SPG11</i> p.Asn278Ser                                                                      |
| 44. | F | 48 | ε33 | EOAD | Not               | 26 | 3 | <i>SPG11</i> p.Asn278Ser, <i>NOTCH3</i> p.Asp736Glu,                                                                                            |

|     |   |    |     |      |          |    |    |                                                                                                                                                              |
|-----|---|----|-----|------|----------|----|----|--------------------------------------------------------------------------------------------------------------------------------------------------------------|
|     |   |    |     |      | checked  |    |    | <i>ATP13A2</i> p.Arg500Leu                                                                                                                                   |
| 45. | M | 65 | ε33 | AD   | Negative | 24 | 2  | <i>SORL1</i> p.Gly1524Arg, <i>NOTCH3</i> p.Gly840Glu                                                                                                         |
| 46. | F | 59 | ε33 | AD   | NA       | 28 | 3  | <i>PSEN2</i> p.His169Asn, <i>BINI</i> p.Pro431Leu, <i>LRP6</i> p.Ile143Val                                                                                   |
| 47. | F | 59 | ε33 | AD   | Negative | 22 | 3  | <i>PARK7</i> p.Ala104Thr, <i>NOTCH3</i> p.Leu1518Met, p.Arg1175Trp                                                                                           |
| 48. | F | 62 | ε34 | AD   | NA       | 22 | 1  | <i>GAB2</i> p.Gly135Val                                                                                                                                      |
| 49. | F | 60 | ε33 | AD   | NA       | 22 | 1  | <i>SPG11</i> p.Asp146Gly                                                                                                                                     |
| 50. | M | 62 | ε23 | EOAD | Negative | 22 | 1  | <i>LRRK2</i> p.Pro1446Leu                                                                                                                                    |
| 51. | M | 37 | ε33 | AD   | Negative | 19 | 6  | <i>PSEN1</i> p.Gly417Ala, <i>NOTCH3</i> p.Leu1518Met, <i>S100A9</i> p.Glu99Lys, <i>GAB2</i> p.Pro317Leu, <i>PRNP</i> p.Met129Val, <i>ATP13A2</i> p.Pro606Arg |
| 52. | F | 46 | ε33 | AD   | Negative | 27 | 4  | <i>PRNP</i> p.Glu219Lys, <i>ABCA7</i> p.Asp964Glu, p.Arg975Cys, p.Phe2071Cys                                                                                 |
| 53. | M | 50 | ε44 | AD   | Negative | 31 | 1  | <i>SIGMAR1</i> p.Arg208Trp                                                                                                                                   |
| 54. | F | 52 | ε33 | AD   | NA       | 19 | 1  | <i>MAPT</i> p.Pro140Ser                                                                                                                                      |
| 55. | F | 54 | ε33 | AD   | NA       | 25 | 2  | <i>ABCA7</i> p.Asn1930Ser, <i>NOTCH3</i> p.Pro774Ala                                                                                                         |
| 56. | F | 52 | ε34 | AD   | Negative | 29 | NA | NA                                                                                                                                                           |

|     |   |    |     |        |                      |    |    |                                                                                                          |
|-----|---|----|-----|--------|----------------------|----|----|----------------------------------------------------------------------------------------------------------|
| 57. | M | 64 | ε33 | EOAD   | NA                   | 21 | NA | NA                                                                                                       |
| 58. | M | 62 | ε33 | EOAD   | Positive<br>(mother) | 23 | 4  | <i>CLU</i> p.Arg127His, <i>CSF1R</i> p.Gly936Ser, <i>ALS2</i><br>p.Leu760Val, <i>DAO</i> p.Leu160Asn     |
| 59. | F | 53 | ε33 | EOAD   | NA                   | 20 | 1  | <i>SQSTM1</i> p.Arg415Trp                                                                                |
| 60. | F | 62 | ε33 | EOAD   | Negative             | 27 | 2  | <i>PRNP</i> p.Glu219Lys, <i>SPG11</i> p.Ile2298Val                                                       |
| 61. | F | 56 | ε44 | EOAD   | Negative             | 25 | 2  | <i>SIGMAR1</i> p.Arg208Trp, <i>GAB2</i> p.Gly135Val                                                      |
| 62. | F | 54 | ε33 | EOAD   | Positive             | 27 | 2  | <i>PSEN1</i> p.Gly209Ala, <i>SPG11</i> p.Asn278Ser                                                       |
| 63. | F | 46 | ε33 | MCI-AD | Negative             | 25 | 3  | <i>PARK7</i> p.Ala179Thr, <i>SPAST</i> p.Ile592Lys, <i>MAPT</i><br>p.Pro140Ser, <i>PARK2</i> p.Tyr267His |
| 64. | F | 59 | ε33 | EOAD   | Negative             | 24 | 2  | <i>NOTCH3</i> p.Val237Met, <i>SIGMAR1</i> p.Arg208Trp                                                    |
| 65. | F | 63 | ε33 | AD     | Negative             | 24 | 12 | <i>CTNNA3</i> p.Ile617Thr                                                                                |
| 66. | M | 60 | ε33 | AD     | Negative             | 20 | NA | NA                                                                                                       |
| 67. | M | 65 | ε33 | AD     | Negative             | 21 | NA | NA                                                                                                       |
